# Supplementary material for: Hyperglycemia induced cathepsin L maturation linked to diabetic comorbidities and COVID-19 mortality
Source: eLife. 2024 Aug 16;13:RP92826. doi: 10.7554/eLife.92826 (PMC11329274; doi:10.7554/eLife.92826)
Supplement: Figure 1—source data 1. [file elife-92826-fig1-data1.xlsx]

## Sheet: Sheet1
	Disease	age	Gender	Potassium(mmol/L)	Sodium(mmol/L)	Chloride(mmol/L)	Aspartate aminotransferase(U/L)	Alanine aminotransferase(U/L)	Albumin(g/L)	Albumin/Globulin ratio	Blood urea nitrogen(mmol/L)	Creatinine(μmol/L)	C-reactive protein(mg/L)	Procalcitonin(mg/L)	White blood cell count(×109)	Hemoglobin(g/L)	Platelet count(×109)	Neutrophil percent(%)	Lymphocyte percent(%)	Creatine kinase–MB(ng/mL)	Myoglobin(g/L)
	non-DM	78	Male	4.64	144.3	110.9	30	28	28.2	0.7	13.69	119.1	7.42	0.11	11.55	152	203	87	7.1	53	48.6
	non-DM	56	Male	4.47	136.6	101.1	16	24	34.7	1.3	3.47	52	35.45	0.03	7.95	117	413	77.4	14.1	9	28
	non-DM	47	Female	4.99	137.2	100	17	25	43.1	1.5	3.97	64.6	1.56	ND	6.8	150	208	66.3	28.1	7	26
	non-DM	37	Female	3.94	138.9	97.7	35	24	30.2	0.9	3.14	59.9	76.79	ND	5.84	123	293	68.2	22.3	7	29
	non-DM	56	Female	4.19	140.6	105.8	16	14	40	1.7	5.28	52.3	3.84	0.03	4.49	124	219	65.6	27.5	8	59
	non-DM	34	Female	4.42	138.8	105.6	17	17	37	1.3	4.27	62.5	ND	ND	6.27	128	168	61.7	33	11	75
	non-DM	65	Male	2.95	132.6	96.9	54	44	28.2	0.8	3.66	64.7	98.13	ND	8.19	130	193	85.4	11.6	26	ND
	non-DM	49	Male	4.18	143.9	109.4	19	41	39.9	1.8	2.62	68.7	2.16	0.03	7.56	132	183	69	21.7	6	26.6
	non-DM	50	Female	4.14	140.9	101	22	22	43.2	1.5	4.22	50.4	3.41	0.03	7.32	145	228	65.3	28.6	22	47.1
	non-DM	55	Female	3.54	139.7	107.5	47	20	27.6	1.4	2.36	46.6	56.86	0.54	3.11	106	77	52	32.8	13	53
	non-DM	74	Male	4.49	138.2	105	47	54	29.1	0.7	8.65	119.3	13.58	0.13	8.49	154	478	69.7	20.5	9	75
	non-DM	66	Female	4.44	146	109.8	25	39	39	1.3	3.11	65.8	0.75	0.08	6.23	136	209	55.6	35.3	12	34
	non-DM	62	Female	4.59	137.7	99.1	19	19	27.3	0.8	2.68	57	65.04	0.09	4.73	115	138	82	10.9	12	33
	non-DM	58	Female	3.59	142.7	108	34	34	30.8	1.1	3.63	71.7	1.92	0.2	6.17	117	293	50.4	40.7	8	53
	non-DM	52	Male	3.17	134.9	99.5	29	30	38.2	1.4	3.78	86	15.89	ND	5.53	130	207	65.6	27.1	16	34
	non-DM	73	Female	3.37	140.3	104	33	31	27.3	0.8	2.44	49.6	8.74	0.08	3.57	111	207	68.9	21	8	ND
	non-DM	62	Female	4	139.4	104.6	25	46	34.4	1	5.34	44.6	0.66	ND	4.4	112	263	72.8	22.2	13	20.8
	non-DM	52	Male	3.8	139.8	104.2	37	56	32.4	1.2	3.4	68.3	ND	0.05	4.08	134	283	57	29.9	ND	ND
	non-DM	79	Female	2.81	142	103.7	22	23	23.7	0.6	2.78	53.7	9.6	ND	3.76	102	224	67.8	21.5	12	ND
	non-DM	73	Female	4.4	141.3	102.1	61	66	28.7	0.8	8.83	107.3	4.42	0.04	5.75	135	406	78.2	12.3	11	ND
	non-DM	53	Male	4.03	138.7	99.1	51	40	35.3	1.1	7.08	86.1	84.63	0.06	8.43	161	212	86.7	9.7	30	39.3
	non-DM	57	Female	2.97	138.6	102.1	49	62	28.9	0.9	3.09	42.3	80.67	0.06	4.59	117	229	70.4	18.6	8	26.5
	non-DM	64	Female	4.37	142.4	105.4	40	49	32.7	0.9	4.84	52.4	0.63	ND	4.91	117	194	55.2	31.8	12	23.6
	non-DM	57	Male	4.48	141	104.1	42	41	35.2	1.4	4.58	78.6	29.04	ND	3.91	120	388	67.4	21.3	16	ND
	non-DM	91	Male	4.29	138.5	106.6	20	44	24.2	0.8	7.24	65.9	39.92	0.07	7.62	103	385	71	15	7	ND
	non-DM	64	Female	ND	ND	ND	ND	ND	ND	ND	ND	ND	ND	ND	ND	ND	ND	64.7	24.3	ND	16.8
	non-DM	56	Male	3.59	143.6	105.4	36	51	26.5	0.9	5.13	62	0.1	0.05	8.03	111	292	70.6	17.1	10	ND
	non-DM	41	Female	3.74	142.1	104.6	29	39	27.4	0.8	4.22	54	13.04	0.1	6.05	122	322	67.9	22.4	12	22.3
	non-DM	29	Female	4.04	137.8	101.7	12	15	34.3	1.3	6.57	64.4	1.56	ND	8.24	117	211	77.5	17.1	12	ND
	non-DM	51	Male	3.84	141.9	107.3	18	14	32.7	1.1	5.86	103.9	36.14	0.04	2.63	139	223	66.9	23.9	6	ND
	non-DM	63	Female	3.37	137.4	98.5	25	34	23.7	0.7	2.33	51.9	40.46	0.05	5.34	110	209	73.5	18.9	9	ND
	DM	39	Male	4.06	142	105.6	63	52	34.3	1	3.41	80.4	32.09	0.07	5.03	149	186	55.8	29.2	19	20.9
	DM	75	Female	3.98	135	97.6	30	39	39.5	1.6	10.03	75.5	0.1	ND	5.46	142	162	52	35.9	9	ND
	DM	58	Male	4.61	132.2	100.5	34	55	31.1	0.7	5.88	126.1	22.52	ND	6.02	137	234	72.3	16.5	21	45.6
	DM	61	Female	3.79	140.8	108	55	92	27.1	0.9	5.89	43.2	ND	0.05	8.18	145	231	76.7	17	ND	34
	DM	67	Female	5.04	132.9	100.7	51	93	23.7	0.5	7.36	59.9	4.9	ND	4.64	105	185	92.3	4.8	15	129
	DM	60	Female	3.45	141.7	102.3	37	52	27.7	0.9	2.06	50.9	76.6	0.04	4.88	120	310	78.6	14.5	11	130
	DM	71	Male	3.28	137	98.3	31	23	27.3	0.7	5.31	87	38.89	ND	7.99	156	161	89.9	5.4	26	302.3
	DM	50	Male	3.96	134	99	66	63	28.3	0.9	5.03	69.8	94.69	ND	7.55	126	153	89.2	7.2	14	ND
	DM	73	Female	3.03	139.5	99.4	21	29	28	0.7	2.82	49.5	59.58	0.07	11.21	129	432	83	12.1	10	ND
	DM	52	Male	4.17	137.8	104	28	27	25.6	0.6	8.62	102.1	80.15	0.11	13.68	151	206	96.1	2.9	22	60.4
	DM	65	Male	3.68	139.9	104.2	25	34	19.8	0.7	3.97	69.7	57.93	0.08	7.89	125	232	84.2	9.7	10	143.8
	DM	68	Male	4.71	131.4	102.4	35	36	28.5	0.8	18.7	209.2	ND	2.29	9.56	123	190	93.1	3.2	ND	ND
	DM	70	Female	3.13	135.8	96.5	31	41	29.6	1	1.88	57.7	ND	ND	4.45	121	163	59.4	27.5	ND	ND
	DM	65	Male	4.11	141.4	107.9	93	53	27.9	0.9	9.27	94.2	42.36	0.16	6.16	132	258	90.7	6.4	17	1500
	DM	38	Male	3.82	143.1	104	75	166	24.8	0.7	6.01	58.5	53.37	ND	7.6	136	278	85.5	9.6	19	60.4
	DM	60	Male	3.9	135	98.1	25	21	24.3	0.6	7.14	77.4	137.8	0.05	8.15	156	229	84.8	12.9	30	67
	DM	84	Female	4.81	135.5	103	141	48	28.4	0.7	10.54	98.3	ND	ND	7.43	102	132	77.6	18.1	ND	ND
	DM	57	Male	3.24	135.5	98.7	35	35	21.7	0.6	5.03	56.7	132.97	0.26	ND	112	395	74.6	14.3	8	ND
	DM	63	Male	3.52	135.3	97.4	117	170	29.4	0.9	5.69	92.6	124.32	0.44	5.93	105	147	89	6.3	10	100.3
	DM	56	Male	3.71	135.2	96.6	36	40	44.8	1.5	4.07	92.2	15.2	132.35	5.86	167	204	69.7	20.4	44	ND
	DM	72	Male	3.55	139	103.7	52	54	28.6	0.7	6.68	74.7	58.54	0.18	16.04	146	286	89.1	6.2	26	44.8
	DM	64	Male	4.36	136	105.2	30	40	24.7	0.6	7.53	73.5	ND	ND	8.48	136	160	86	8.9	ND	ND
	DM	48	Male	4.07	143.4	108	18	30	33.3	1.1	5.16	63.8	0.99	0.05	3.64	113	199	47.5	41.5	10	25.7
	DM	83	Female	3.45	145.8	110.5	14	21	34.1	1.3	5.34	65.4	ND	0.12	4.54	119	291	67.2	16.6	ND	ND
	DM	60	Female	3.28	136.3	99	44	40	41.3	1.15	ND	71	26.3	0.13	3.29	142	122	49.7	39	ND	57
	DM	60	Female	4.38	139.1	102.5	27	28	44.1	1.33	ND	60	5.7	0.01	5.3	143	205	67.5	24	ND	58
	DM	47	Female	4.47	131	100.1	26	19	29.6	0.61	ND	335	89.1	0.3	7.02	99	305	73.7	18.7	ND	82
	DM	42	Male	4.28	136.9	99	18	28	37.4	1.08	ND	74	17	0.12	3.49	133	329	72.3	21	ND	28
	DM	60	Male	4.22	140.3	104.8	28	43	39.3	1.23	ND	74	1.3	0.17	5.12	155	211	62.8	31.1	ND	34
	DM	82	Female	4.93	128.3	92.5	52	25	21.9	0.49	ND	102	169.9	0.22	7.24	135	111	85.6	7	ND	129
	DM	63	Male	4.42	130.1	95	30	23	33.7	0.82	ND	117	111.6	0.11	4.02	142	139	74.1	18.7	ND	130
	ND: Not detected
