# Supplementary material for: Hyperglycemia induced cathepsin L maturation linked to diabetic comorbidities and COVID-19 mortality
Source: eLife. 2024 Aug 16;13:RP92826. doi: 10.7554/eLife.92826 (PMC11329274; doi:10.7554/eLife.92826)
Supplement: Figure 2—source data 1. [file elife-92826-fig2-data1.xlsx]

## Sheet: Sheet1
	Figure 2A. Correlation between CTSL activity & HbA1c						Figure 2B. Correlation between CTSL concentration & HbA1c						Figure 2C. CTSL activity				Figure 2D. CTSL concentration
	Healthy HbA1c	Healthy CTSL activity	DM HbA1c	DM CTSL activity			Healthy HbA1c	Healthy CTSL concentration	DM HbA1c	DM CTSL concentration			Healthy	DM			Healthy	DM
	5.7	688.51	7.4	7222.64			5.7	1235.66	7.4	1733.02			688.51	7222.64			1235.66	1733.02
	5.5	1769.99	5.9	6273.98			5.5	1335.65	5.9	1372.49			1769.99	6273.98			1335.65	1372.49
	5	1309.75	6.3	4812.29			5	1592.61	6.3	2555.25			1309.75	4812.29			1592.61	2555.25
	5.2	618	9.1	2482.35			5.2	949.32	9.1	2475.02			618	2482.35			949.32	2475.02
	5.2	653.55	5.8	2980.98			5.2	1604.73	5.8	1946.31			653.55	2980.98			1604.73	1946.31
	5.4	521.15	8.5	3715.43			5.4	1592.61	8.5	1385.7			521.15	3715.43			1592.61	1385.7
	6.2	385.03	7.3	3144.79			6.2	2016.86	7.3	1421.46			385.03	3144.79			2016.86	1421.46
	5	640.84	8.1	3797.03			5	1266.88	8.1	1655.69			640.84	3797.03			1266.88	1655.69
	5.1	488.31	8.1	2382.15			5.1	1151.43	8.1	3388.11			488.31	2382.15			1151.43	3388.11
	5.6	397.75	8.7	1923.72			5.6	2046.32	8.7	1910.95			397.75	1923.72			2046.32	1910.95
	5.1	445.94	7.2	2875.98			5.1	1437.55	7.2	2190.53			445.94	2875.98			1437.55	2190.53
	5.7	532.53	6.9	2836.37			5.7	933.27	6.9	1891.67			532.53	2836.37			933.27	1891.67
	5.2	773.78	8.3	1914.72			5.2	1674.9	8.3	1662.21			773.78	1914.72			1674.9	1662.21
	5.7	460.24	9.2	3230.6			5.7	1196.18	9.2	3761.21			460.24	3230.6			1196.18	3761.21
	5	462.89	8	3572.62			5	1381.99	8	1253.6			462.89	3572.62			1381.99	1253.6
	5.2	467.66	7.1	3710.63			5.2	1774.05	7.1	2916.1			467.66	3710.63			1774.05	2916.1
	5.5	450.71	8.7	3991.44			5.5	1252.67	8.7	2784.65			450.71	3991.44			1252.67	2784.65
	5.3	432.17	6.2	3632.62			5.3	1238.49	6.2	1720.78			432.17	3632.62			1238.49	1720.78
	5.4	397.22	11	6428.19			5.4	1162.59	11	2588.76			397.22	6428.19			1162.59	2588.76
	5.4	427.4	8.7	3697.43			5.4	1417.02	8.7	2977.96			427.4	3697.43			1417.02	2977.96
	7	422.64	9.9	3118.39			7	2172.42	9.9	2126.73			422.64	3118.39			2172.42	2126.73
	5.2	448.06	7.4	3268.4			5.2	2229.75	7.4	1990.13			448.06	3268.4			2229.75	1990.13
	5.3	482.48	7	6822.42			5.3	1249.83	7	1939.87			482.48	6822.42			1249.83	1939.87
	5.4	329.42	6.2	2266.34			5.4	1140.3	6.2	2252.18			329.42	2266.34			1140.3	2252.18
	5.8	1126.5	7.9	3148.39			5.8	2398.22	7.9	3126.3			1126.5	3148.39			2398.22	3126.3
	5.3	578.88	5.9	3757.43			5.3	1087.77	5.9	2034.33			578.88	3757.43			1087.77	2034.33
	5.2	499.43	6.4	2248.34			5.2	1690.28	6.4	2528.26			499.43	2248.34			1690.28	2528.26
	5.6	1384.43	6.2	1645.9			5.6	1770.93	6.2	1924.82			1384.43	1645.9			1770.93	1924.82
	5	642.43	7.3	3049.99			5	2828.61	7.3	2270.69			642.43	3049.99			2828.61	2270.69
	5.3	373.91	5.9	3836.64			5.3	1338.53	5.9	1469.84			373.91	3836.64			1338.53	1469.84
	6.3	647.2	6.7	3638.62			6.3	1894.14	6.7	2434.95			647.2	3638.62			1894.14	2434.95
	5.6	457.59	6.8	3819			5.6	1535.44	6.8	2733.56			457.59	3819			1535.44	2733.56
	5.9	477.19	7	2837			5.9	1550.43	7	1218.44			477.19	2837			1550.43	1218.44
	6.3	476.66	5.3	1977			6.3	1684.12	5.3	1054.28			476.66	1977			1684.12	1054.28
	5.6	632.01	5.3	2839			5.6	1792.84	5.3	1262.19			632.01	2839			1792.84	1262.19
	5.7	426.87	6.3	2905			5.7	2394.73	6.3	1313.21			426.87	2905			2394.73	1313.21
	5.8	462.84	6.4	3258			5.8	1379.09	6.4	2118.99			462.84	3258			1379.09	2118.99
	6	542.66	5.8	3979			6	1464.08	5.8	1715.66			542.66	3979			1464.08	1715.66
	5.6	537.89	8.2	2445			5.6	1043.93	8.2	1571.47			537.89	2445			1043.93	1571.47
	4.9	838.11	7.2	3036			4.9	1827.46	7.2	2146.22			838.11	3036			1827.46	2146.22
	5.2	745.78	6.2	2729			5.2	770.36	6.2	1654.22			745.78	2729			770.36	1654.22
	5	412.21	8	2516			5	2396.88	8	2471.87			412.21	2516			2396.88	2471.87
	5.7	413.99	15.1	2794			5.7	1683.08	15.1	1357.08			413.99	2794			1683.08	1357.08
	5.8	302.6	8	3014			5.8	1300	8	1485.22			302.6	3014			1300	1485.22
	5.9	408.63	6.2	2486			5.9	1455.8	6.2	1379.24			408.63	2486			1455.8	1379.24
	5.3	357.4	4.8	3488			5.3	1583.45	4.8	1662.86			357.4	3488			1583.45	1662.86
	5.2	520.62	6.1	2818			5.2	2931.42	6.1	1409.54			520.62	2818			2931.42	1409.54
	5.3	477.13	5.5	1814			5.3	1800.34	5.5	2560.41			477.13	1814			1800.34	2560.41
	5.5	563.16	6	2552			7.5	1300	6	1011.88			448.54	2552			1300	1011.88
	5.9	517.64	7.7	3085			5.9	2376.09	7.7	1335.78			517.64	3085			2376.09	1335.78
	5.4	442.59	9.5	7836			5.4	1282.9	9.5	1705.26			442.59	7836			1282.9	1705.26
	5.3	529.55	5.1	2568			5.3	1492.85	5.1	1391.61			529.55	2568			1492.85	1391.61
	5.2	427.1	5.6	3453			5.2	2180.16	5.6	1619.7			427.1	3453			2180.16	1619.7
	5.9	454.5	6.8	2644			5.9	1353.3	6.8	1875.55			454.5	2644			1353.3	1875.55
	5.1	349.66	5	3389			5.1	1849.93	5	1601.6			349.66	3389			1849.93	1601.6
	5.6	540.28	10.9	2505			5.6	3028.55	10.9	1333.65			540.28	2505			3028.55	1333.65
	5.1	622	9.8	2876			5.1	850.06	9.8	1541.82			622	2876			850.06	1541.82
	5.8	472.37	7.8	4474			5.8	1200.02	7.8	1593.84			472.37	4474			1200.02	1593.84
	5.2	585.55	5.7	2359			5.2	1051.07	5.7	1517.36			585.55	2359			1051.07	1517.36
	5.2	538.49	8.5	1999			5.2	1764.71	8.5	1829.2			538.49	1999			1764.71	1829.2
	5.8	561.12	6.6	3813			5.8	3335.61	6.6	1406.55			561.12	3813			3335.61	1406.55
	Statistical test: Spearman correlation analysis						Statistical test: Spearman correlation analysis						Statistical test: unpaired t-test				Statistical test: unpaired t-test
		Figure 2E. Hyperglycemic Clamp Blood Glucose
		Time (min)	Volunteers
			1	2	3	4	5	6	7	8	9	10	11	12	13	14	15
		-30	4.7	5.48	5.26	4.54	4.75	4.99	4.61	5.1	4.87	5.53	5.34	5.24	5.15	5.23	4.75
		-15	4.73	5.11	6.01	5.7	4.4	5.04	5.09	4.97	5.05	5.39	5.67	5.25	5.11	5.1	5.12
		0	4.75	5.03	4.37	5.16	4.81	5	4.49	4.81	4.94	5.51	4.51	5.24	5.11	5.14	4.94
		2	9.1	7.53	11.89	8.74	6.11	9.44	8.88	7.37	5.58	8.87	7.76	8.82	9.79	7.06	8.98
		4	9.25	9.9	12.55	11.59	8.02	12.14	10.62	9.77	7.93	11.18	12.89	11.74	12.3	12.26	11.71
		6	11.84	11.06	13.09	12.19	10.65	13.41	10.92	11.64	10.48	10.72	13.55	12.65	13.4	12.77	12.68
		8	11.96	11.5	13.13	11.04	12.33	12.89	10.62	12.1	12.93	10.98	12.62	13.38	12.54	13.11	12.6
		10	11.45	12.27	12.78	11.83	12.23	13.1	11.11	13.43	12.25	11.53	13.06	13.68	12.24	13.96	13.12
		15	11.01	12.96	11.53	10.5	11.65	12.08	10.99	12.02	11.28	13.81	11.85	12.68	12.59	11.45	11.32
		20	11.35	12.77	11.32	10.77	11.08	11.19	11.67	11.66	11.19	13.68	12.52	12.07	11.84	11.57	11.28
		25	11.34	13.16	13.96	11.28	10.46	11.59	12.19	12.53	10.87	12.77	11.83	12.36	12.61	10.14	10.97
		30	10.73	12.96	12.74	12.83	11.18	11.56	12.6	12.7	11.06	13.25	11.55	12.53	11.67	10.98	11.17
		35	11.17	13.67	11.5	11.73	11.44	11.8	12.62	9.73	11.19	12.15	11.75	12.23	12.91	11.9	11.78
		40	11.69	13.12	12.3	12.43	11.48	11.33	12.27	11.64	11.57	12.29	11.56	12	12.57	12.75	12.38
		45	11.11	11.91	13.69	13.17	11.83	11.2	11.73	11.52	11.85	11.5	11.87	11.79	12.35	13.23	12.41
		50	9.39	10.88	13.03	12.04	11.64	11.42	11.1	11.57	13.55	11.06	12.15	12.24	11.6	12.96	12.75
		55	10.77	11.1	11.91	13	11.93	11.29	11.36	11.43	11.99	11.46	12.14	12.13	12.3	12.83	12.26
		60	10.9	11.63	11.9	12.48	12.12	10.81	11.12	11.22	11.87	11.3	12.24	12.26	11.69	12.84	12.08
		65	10.64	11.53	12.14	11.67	12.08	12.14	10.91	11.43	11.36	12.1	12.19	12.35	12.16	12.45	11.93
		70	10.76	11.02	12.32	11.48	12.19	11.3	10.98	11.34	10.91	13.22	11.97	11.97	11.62	12.23	11.85
		75	10.9	12.22	11.93	11.1	11.67	11.63	10.29	11.32	12.56	13.7	11.7	12.17	12.14	11.66	11.93
		80	10.76	12.44	11.92	11.31	11.33	11.52	11.17	11.62	11	13.22	11.77	12.29	11.92	11.5	11.66
		85	12.8	12.48	12.12	11.39	11.34	12.75	12.86	11.8	12.65	12.11	11.46	12.44	11.85	12.34	11.69
		90	13	12.55	11.62	11.3	11.18	11.21	10.91	12.21	12.44	12.47	11.89	12.25	11.74	11.65	11.9
		95	12.69	13.41	11.46	11.52		12.58	11.16	11.54	12.07	11.62	12.13	12.19	11.13	11.47	11.97
		100	12.02	12.93	11.79	10.71		12.1	12.34	12.47	12.17	11.56	11.74	11.8	12.35	11.35	12.19
		105	12.8	12.45	11.71	12.1	10.51	11.8	12.36	12.46	11.49	11.73	12.09	11.95	12.03	12.05	12.54
		110	12.85	12.2	11.84	12.06	11.38	10.56	12.38	12.11	11.41	11.53	11.92	11.79	11.49	12.13	12.74
		115	12.5	11.65	11.67	12.72	12.22	10.84	11.95	11.98	11.86	12.33	11.69	12.24	12.03	10.93	12.19
		120	11.74	11.18	11.95	12.16	12.45	12.09	11.65	12.08	12.05	12.41	12.58	11.97	12.12	11.21	12.24
		125	11.14	11.34	11.83	11.84	11.89	11.84	10.88	11.86	11.18	14.14	12.19	12.12	12.22	12.56	12.25
		130	11.6	11.68	12.79	12.66	12.48		11.32	11.2	11.02	13.68	12.38	12.01	13.15	12.18	11.48
		135	11.36	11.71	11.85	11.68	11.53	10.77	10.38	11.28	11.29	12.96	11.81	12.28	12.4	12.68	11.9
		140	11.92	12.53	11.93	12.67	11.77	11.14	11.05	11.11	11.72	12.99	11.66	12.27	12.12	13.24	12.11
		145	11.07	12.78	12.03	12.44	11.79	11.4	11.4	11.89	11.8	13.23	12.77	12.94	11.38	12.56	12.16
		150	11.79	13.13	11.34	12.27	10.25	12.39	11.77	11.75	10.94	12.37	10.76	12.56	12.08	12.76	12.42
		155	11.24	12.94	11.38	12.56	10.95	11.44	11.92	12.35	12.28	12.12	11.57	12.79	12.56	12.94	11.51
		160	11.9	12.25	11.23	12.3	12.55	12.34	11.2	12.13	12.36	11.78	11.78	12.37	12.02	12.11	11.98
		Figure 2F. Hyperglycemic Clamp Blood Insulin
		Time (min)	Volunteers
			1	2	3	4	5	6	7	8	9	10	11	12	13	14	15
		-30	4.2	5.9	6	9.4	3.7	6.4	6.3	3.8	2.5	6	5.7	6.7	4	4.1	6.5
		-15	4.8	6.9	7.6	8.3	3.9	6.1	4.4	4.3	2.3	4.8	5.6	6.4	4.5	3.3	9.2
		0	5.4	6.3	7.8	6.8	3.6	5.7	3.8	4.1	2.2	5	6.4	6.8	4.3	3.2	7.5
		2	40.1	10.9	36.2	53.5	11.4	24	8.5	24	8.9	13.3	22.9	21.2	16.5	15.5	55.3
		4	33.7	74.5	194.9	125.2	107.7	62.2	73.2	59.7	31.6	57.1	86.6	106.7	79.3	159.1	152
		6	30.7	89.9	191.4	102.6	108.5	54.2	67.4	51.6	46.2	54.5	82.8	89.8	57.8	148.9	131.5
		8	21.7	81.5	150	69.8	84.6	43.3	48.6	46.8	41.3	45.7	63.3	60.3	41.9	119.8	101.5
		10	21	72.5	113.5	52.4	78.4	37.2	38.3	47.6	34.6	37.5	52.1	58.3	32.2	100.9	88.3
		20	26.4242	70.6	59.4	42.7	47.9	31.5	31.7	57.8	25.7	29	38.7	51.2	27.2	48.1	60.2
		30	28	61.2	50.7	56.1	43.8	37.6	30.8	67.5	29.2	32	33.7	54.8	30	38.1	53.7
		40	38.2413	65.6	61.2	73.7	48.1	41	42.6	72.3	37.6	42.2	41.3	63.1	35.9	53.5	76.8
		50	40.2	65.2	73.9	83	77.3	48.7	64.6	90	47.1	40	47.6	66.8	48.3	57.1	80.4
		60	45.5134	66.6	93.8	100	77.2	57.2	55.1	94	50	45.6	59.4	75.4	47.4	74.4	89.4
		70	47.3314	78.3	129	102.5	86.4	64.7	55.6	110.6	52.7	58.6	78	82.2	43.8	73.1	80.8
		80	44.9	89.1	118.5	110.5	87.2	72.3	58.5	127.7	54.8	67.5	76.9	91.6	48.1	79.4	87.9
		90	45.2	107.4	136.5	116.9	80.2	86.9	49.7	139.9	54.1	81.2	77.5	96.6	54.6	85.8	99.1
		100	47.4	127.6	156.5	139.6	109.8	96.9	66	150.4	73.1	69.5	76.8	102.6	64.8	94.4	104.7
		110	62.7846	129.5	158.6	135.2	183	101	70.3	164.2	91.6	76.6	86.3	113.6	67	95.5	128.3
		120	61.7	115.4	170.5	131.3	185.9	103.5	97.8	184.1	81.8	80.9	97.4	105.6	73.7	98.2	128
		130	63.6936	123.4	181.2	149.1	214.3	107.5	101	176.2	71.3	86.7	103	110.9	68.3	103.6	120.1
		140	67.3296	136.4	236.6	143.6	229.3	108.3	98.1	177.7	79.3	85.6	96.2	112.4	77.9	105.7	127.8
		150	87	153.7	209.4	165.8	238.9	124.5	93.9	197.7	95.9	103.7	99.7	120.6	82.3	119.9	126.2
		160	85.9	162	204.7	177	237.1	110.2	96.6	212.4	122.7	111	99.7	123.7	92.2	111.3	138.5
		Figure 2G. Hyperglycemic Clamp Blood Insulin
		Time (min)	Volunteers
			1	2	3	4	5	6	7	8	9	10	11	12	13	14	15
		-30	1.2	1.5	1.9	2.1	1.5	1.6	1.8	1.4	0.8	1.5	1.3	1.7	1.4	1.2	1.4
		-15	1.2	1.6	2	2	1.4	1.6	1.6	1.4	0.8	1.4	1.4	1.6	1.5	1.1	1.6
		0	1.4	1.5	2	1.9	1.4	1.6	1.5	1.4	0.7	1.4	1.4	1.8	1.5	1.1	1.6
		2	3.2	1.8	4.5	5	1.9	2.7	1.9	2.9	1.1	2.2	2.5	2.7	2.5	2	4.8
		4	3	5	12.3	8.1	6.2	4.7	6.2	4.7	2.5	4.3	5.9	6.8	6.2	8.8	8.6
		6	3.3	6	12.2	7.5	6.9	4.9	6	4.7	3.9	4.3	5.9	6.5	5.5	8.6	8.4
		8	3	6.2	11.2	6.4	6.7	4.6	5.6	4.8	4.1	4.2	5.4	5.7	5	8.2	7.6
		10	3	6	10	6	6.6	4.4	5.3	5	3.7	4.1	5.2	5.6	4.6	7.9	7.3
		20	3.5	7.1	8.4	5.8	6.8	4.5	5.3	6.4	3.7	4.1	4.9	6.1	4.7	6.7	6.7
		30	3.9	7.6	8.5	7	6.4	5.2	6.6	7.4	4.4	4.5	5.1	6.9	5.4	6.3	6.8
		40	4.8	8.2	9.7	8.5	7	5.9	7.4	8.2	5.4	5.3	5.7	7.8	6.3	7.7	8.3
		50	5.4	8.2	11.3	9	8.6	6.6	9.4	9.5	6.3	5.8	6.4	8.2	7.6	8.4	9.2
		60	5.6	8.9	13	10.5	8.8	7.3	9.2	10.3	7	6.3	7.4	9.3	8	9.8	10.1
		70	5.8	9.2	14.8	10.8	9.5	7.9	9.5	11.4	7.4	7.6	8.6	9.9	7.8	10.1	10
		80	6.1	10.7	15.3	11.6	10	8.5	9.8	12.5	7.6	8.2	8.8	10.4	8.3	10.7	10.4
		90	7.6	11.5	16	12.1	10	9.6	9.9	13.7	7.9	9.4	9.1	10.8	8.9	11.3	11.2
		100	6.8	12.6	17.1	13.3	11.5	10.3	10.7	14.2	8.7	8.6	9	11.4	9.6	12.1	11.5
		110	7.5	13	17.2	12.9	13.5	10.8	11.2	14.9	10	9.2	9.6	11.9	9.7	12.5	12.7
		120	7.7	12.6	18	12.8	14.5	11.2	12.7	15.6	9.5	9.2	10.3	12.1	10.6	12.7	12.8
		130	7.6	12.9	18.2	13.7	15.8	11	12.9	15.1	9.2	9.7	10.5	12.1	10.4	13	12.6
		140	8	13.7	20.8	13.6	15.9	11.3	12.7	15.6	9.3	9.8	10.4	12.1	10.9	13.2	12.9
		150	8	14.4	19.8	14.5	16.6	12.3	12.9	16.6	10.3	10.6	10.2	12.7	11	14.1	12.7
		160	9.1	14.8	19.9	15.3	16.8	11.9	12.8	17	11.5	11.1	10.4	13	11.6	13.6	13.2
	Figure 2H. Hyperglycemic Clamp CTSL activity
	-30min	160min
	2063	4607
	3440	6473
	4161	6367
	4235	6316
	4669	4656
	3213	4728
	3457	4760
	3028	4239
	4910	5405
	3908	2985
	5729	6840
	6132	7627
	1143	1471
	4255	4523
	2323	3504
	statistical test: paired t-test
		Figure 2I. Hyperglycemic Clamp CTSL activity
		Time (min)	Volunteers
			1	2	3	4	5	6	7	8	9	10	11	12	13	14	15
		-30	0.927133	1.03035	1.08642	1.03919	0.917402	0.970697	0.941223	1.01046	0.935366	0.967513	0.963916	0.98456	0.905821	0.95481	0.961481
		-15	0.991748	1.01063	0.8102	0.94589	0.953288	1.01785	1.00914	0.912213	1.06008	1.01809	1.08714	0.911311	1.12376	1.11039	0.954321
		0	1.08112	1	1.10338	1.01492	1.12931	1.01145	1.04963	1.07733	1.00455	1.01439	0.948944	1.10413	0.970421	0.934797	1.0842
		6	1.19277	0.973427	1.28577	1.16169	1.02947	1.05659	1.00784	0.924039	0.89167	1.5896	1.41305	1.31526	0.959773	1.00904	1.13753
		10	1.13261	0.907938	1.15877	1.12599	1.17161	1.10744	1.07497	1.00773	1.01775	0.940989	1.29443	1.48115	1.01231	1.10458	1.07654
		30	1.29502	1.29779	1.23263	1.4562	1.08119	1.26137	0.964472	0.88151	1.18207	1.47301	1.59386	1.37343	1.01727	1.07231	1.21383
		50	1.25788	1.36876	1.21379	1.31339	1.28709	1.10206	1.16693	1.05913	1.45289	1.26113	1.58465	1.06535	1.08542	1.09793	1.25161
		70	1.49356	1.31099	1.49152	1.33148	1.20916	1.41866	1.10972	1.24994	1.2731	1.01193	1.97965	1.41113	1.31401	1.20529	1.28025
		90	1.34725	1.33602	1.71009	1.43002	1.06055	1.17009	0.840648	1.11462	1.58443	1.60039	1.69981	1.51777	1.19759	1.32085	1.45852
		110	1.21901	1.12429	1.52958	1.04919	1.21873	1.32536	1.42738	1.15465	1.58716	1.48998	2.1167	1.71382	1.16493	1.13299	1.56346
		130	1.39503	1.19955	1.52355	1.39416	1.34142	1.36982	1.44906	1.16397	1.4447	1.65066	1.77812	1.67181	1.24089	1.39703	1.08568
		150	1.41979	1.18755	1.95691	1.27452	1.03208	1.54328	1.36207	1.073	1.46245	1.02118	1.82418	1.63303	1.19546	1.22402	1.39457
		160	1.66513	1.12897	2.07675	1.35163	1.18925	0.810037	1.40726	0.874687	1.68516	1.6123	1.58004	1.6535	1.06768	0.880568	1.56321
	Figure 2H. Hyperglycemic Clamp CTSL concentration
	-30min	160min
	1326.03	1065.6
	947.8	785.5
	713.695	584.3
	1262.28	1373.54
	763.05	807.13
	783.43	758.63
	882.94	898.265
	2102.91	1838.18
	1195.09	1152.67
	966.32	1055.11
	511.875	556.165
	1000.16	902.48
	664.1	781.36
	1054.49	1024.66
	626.985	654.8
	statistical test: paired t-test

## Sheet: Sheet2
	DM/non-DM	HBP/non-HBP	CHD/non-CHD	Gender	Age	BMI	Systolic	Diastolic	Waist	Hip	WHR	HbA1c	SerumCREA	LDL	CTSL activity	CTSL concentration
	non-DM	non-HBP	non-CHD	Female	58	ND	ND	ND	ND	ND	ND	5.7	54	2.25	688.51	1235.66
	non-DM	non-HBP	non-CHD	Male	44	25.91	128	75	84	95	0.88	5.5	88.6	2.54	1769.99	1335.65
	non-DM	non-HBP	non-CHD	Male	67	26.12	118	75	97	105	0.92	5	77.7	2.25	1309.75	1592.61
	non-DM	non-HBP	non-CHD	Female	51	23.05	128	85	90	103	0.87	5.2	55.6	3.26	618	949.32
	non-DM	non-HBP	non-CHD	Female	59	28.89	125	81	85	100	0.85	5.2	68.4	4.38	653.55	1604.73
	non-DM	non-HBP	non-CHD	Female	52	25.28	134	83	85	105	0.81	5.4	60.9	3.01	521.15	1592.61
	non-DM	non-HBP	non-CHD	Female	57	27.43	130	80	86	102	0.84	6.2	58.8	5.29	385.03	2016.86
	non-DM	non-HBP	non-CHD	Female	53	21.8	137	92	84	86	0.98	5	69.8	3.62	640.84	1266.88
	non-DM	non-HBP	non-CHD	Male	46	29.41	120	90	100	104	0.96	5.1	79	4.59	488.31	1151.43
	non-DM	HBP	non-CHD	Male	61	ND	160	100	88	97	0.91	5.6	71.2	2.98	397.75	2046.32
	non-DM	non-HBP	non-CHD	Female	66	20.7	135	85	70	91	0.77	5.1	69.5	3.71	445.94	1437.55
	non-DM	non-HBP	non-CHD	Female	48	30.11	105	65	86	109	0.79	5.7	57.1	2.38	532.53	933.27
	non-DM	non-HBP	non-CHD	Male	57	28.34	125	85	89	102	0.87	5.2	75.9	4.18	773.78	1674.9
	non-DM	non-HBP	non-CHD	Female	53	20.93	105	65	73	84	0.87	5.7	51.2	3.12	460.24	1196.18
	non-DM	non-HBP	non-CHD	Female	49	23.73	106	61	83	88	0.94	5	79.2	2.08	462.89	1381.99
	non-DM	non-HBP	non-CHD	Female	56	24.44	100	80	73	89	0.82	5.2	60.5	2.44	467.66	1774.05
	non-DM	non-HBP	non-CHD	Female	49	23.05	95	70	83	100	0.83	5.5	59.1	2.42	450.71	1252.67
	non-DM	non-HBP	non-CHD	Female	55	22.14	130	85	79	108	0.73	5.3	51.1	4.33	432.17	1238.49
	non-DM	non-HBP	non-CHD	Female	55	26.4	105	90	100	108	0.93	5.4	54.4	4.24	397.22	1162.59
	non-DM	non-HBP	non-CHD	Male	68	22.23	130	75	84	97	0.87	5.4	64.9	3.76	427.4	1417.02
	non-DM	non-HBP	non-CHD	Female	54	22.27	120	80	86	89	0.97	7	85.3	3.42	422.64	2172.42
	non-DM	non-HBP	non-CHD	Male	59	24.49	120	80	90	98	0.92	5.2	98.8	3.35	448.06	2229.75
	non-DM	non-HBP	non-CHD	Female	63	25.24	130	80	78	100	0.78	5.3	59.2	2.02	482.48	1249.83
	non-DM	non-HBP	non-CHD	Female	53	22.27	120	80	88	95	0.93	5.4	43.7	2.8	329.42	1140.3
	non-DM	non-HBP	non-CHD	Female	66	23.19	131	78	89	92	0.97	5.8	58.3	3.19	1126.5	2398.22
	non-DM	non-HBP	non-CHD	Female	53	27.94	125	69	88	93	0.95	5.3	68.1	3	578.88	1087.77
	non-DM	non-HBP	non-CHD	Male	65	21.88	124	69	80	90	0.89	5.2	63	2.07	499.43	1690.28
	non-DM	non-HBP	non-CHD	Female	55	30.04	131	77	110	110	1	5.6	72	3.42	1384.43	1770.93
	non-DM	non-HBP	non-CHD	Male	55	21.45	135	76	83	96	0.86	5	76.9	2.22	642.43	2828.61
	non-DM	non-HBP	non-CHD	Female	67	31.22	130	80	90	100	0.9	5.3	61.5	3.27	373.91	1338.53
	non-DM	non-HBP	non-CHD	Male	69	ND	ND	ND	ND	ND	ND	6.3	65.2	3.21	647.2	1894.14
	non-DM	non-HBP	non-CHD	Male	55	25.35	125	80	94	104	0.9	5.6	85.5	3.12	457.59	1535.44
	non-DM	non-HBP	non-CHD	Female	57	ND	ND	ND	ND	ND	ND	5.9	78.7	3.05	477.19	1550.43
	non-DM	non-HBP	non-CHD	Female	59	22.03	121	71	80	100	0.8	6.3	57.6	3.29	476.66	1684.12
	non-DM	non-HBP	non-CHD	Female	54	25.34	110	80	93	101	0.92	5.6	59.8	3.65	632.01	1792.84
	non-DM	non-HBP	non-CHD	Male	61	25.91	140	90	89	93	0.96	5.7	76.3	3.75	426.87	2394.73
	non-DM	non-HBP	non-CHD	Male	51	25.95	120	90	92	94	0.98	5.8	56	2.84	462.84	1379.09
	non-DM	non-HBP	non-CHD	Female	60	20.83	110	70	73	90	0.81	6	72.3	3.21	542.66	1464.08
	non-DM	non-HBP	non-CHD	Female	57	26.95	110	75	96	101	0.95	5.6	53.2	3.49	537.89	1043.93
	non-DM	non-HBP	non-CHD	Male	58	25.31	135	76	87	98	0.89	4.9	82.4	3.34	838.11	1827.46
	non-DM	non-HBP	non-CHD	Male	57	21.6	100	70	89	ND	ND	5.2	76.4	3.02	745.78	770.36
	non-DM	non-HBP	non-CHD	Male	55	24.46	130	80	85	93	0.91	5	75.1	2.36	412.21	2396.88
	non-DM	non-HBP	non-CHD	Female	57	20.82	130	78	70	103	0.68	5.7	57.9	3.82	413.99	1683.08
	non-DM	non-HBP	non-CHD	Female	62	31.99	117	77	103	114	0.9	5.8	64.2	4.66	302.6	1300
	non-DM	non-HBP	non-CHD	Male	62	26.37	133	79	96	102	0.94	5.9	83.9	5.21	408.63	1455.8
	non-DM	non-HBP	non-CHD	Female	57	24.54	ND	ND	95	98	0.97	5.3	59.5	3.72	357.4	1583.45
	non-DM	non-HBP	non-CHD	Female	70	54.36	ND	ND	106	104	1.02	5.2	49.4	3.17	520.62	2931.42
	non-DM	non-HBP	non-CHD	Female	67	24.78	125	85	84	98	0.86	5.3	59.4	4.87	477.13	1800.34
	non-DM	non-HBP	non-CHD	Female	53	23.83	ND	ND	74	90	0.82	7.5	60.5	2.17	448.54	1300
	non-DM	non-HBP	non-CHD	Male	67	28.34	145	85	98	101	0.97	5.9	80.5	4.62	517.64	2376.09
	non-DM	non-HBP	non-CHD	Male	52	24.68	120	80	86	92	0.93	5.4	90.9	4.21	442.59	1282.9
	non-DM	non-HBP	non-CHD	Male	54	27.34	130	88	92	96	0.96	5.3	78.3	1.87	529.55	1492.85
	non-DM	non-HBP	non-CHD	Male	65	21.48	103	80	87	92	0.95	5.2	92.7	3.25	427.1	2180.16
	non-DM	non-HBP	non-CHD	Male	55	22.15	117	78	73	89	0.82	5.9	77.5	1.1	454.5	1353.3
	non-DM	non-HBP	non-CHD	Male	52	20.76	118	80	76	93	0.82	5.1	79.4	3.46	349.66	1849.93
	non-DM	non-HBP	non-CHD	Male	65	21.26	130	86	84	90	0.93	5.6	73.3	2.29	540.28	3028.55
	non-DM	non-HBP	non-CHD	Female	56	24.97	125	72	83	93	0.89	5.1	54.5	2.91	622	850.06
	non-DM	non-HBP	non-CHD	Male	60	26.3	115	79	93	100	0.93	5.8	97.9	3.85	472.37	1200.02
	non-DM	non-HBP	non-CHD	Female	62	27.25	135	72	105	105	1	5.2	58.3	2.68	585.55	1051.07
	non-DM	non-HBP	non-CHD	Male	61	24.86	121	65	91	100	0.91	5.2	64.9	2.3	538.49	1764.71
	non-DM	non-HBP	non-CHD	Male	63	24.61	120	80	88	92	0.96	5.8	76.8	4.14	561.12	3335.61
	DM	HBP	non-CHD	Female	58	23.58	120	70	86	90	0.96	7.4	45.6	4.14	7222.64	1733.02
	DM	HBP	non-CHD	Female	63	24.77	120	72	75	82	0.91	5.9	51.8	2.49	6273.98	1372.49
	DM	HBP	CHD	Female	60	24.24	132	76	80	86	0.93	6.3	60	3.18	4812.29	2555.25
	DM	HBP	non-CHD	Male	55	22.85	136	70	82	88	0.93	9.1	41.7	3.31	2482.35	2475.02
	DM	HBP	CHD	Female	59	25.77	120	80	82	88	0.93	5.8	56.2	3.35	2980.98	1946.31
	DM	HBP	CHD	Female	61	25.4	142	82	100	106	0.94	8.5	40.9	1.81	3715.43	1385.7
	DM	HBP	non-CHD	Female	75	24.46	142	70	85	90	0.94	7.3	69	3.61	3144.79	1421.46
	DM	HBP	non-CHD	Female	61	29.04	150	80	103	108	0.95	8.1	82.6	2.13	3797.03	1655.69
	DM	HBP	CHD	Male	66	29.38	142	86	108	116	0.93	8.1	112.7	0.93	2382.15	3388.11
	DM	HBP	non-CHD	Female	61	21.48	112	62	78	84	0.93	8.7	60.1	2.28	1923.72	439.11
	DM	non-HBP	non-CHD	Female	67	22.22	120	72	80	86	0.93	7.2	63.5	3.61	2875.98	2190.53
	DM	HBP	CHD	Male	67	30.32	120	80	110	106	1.04	6.9	102	3.52	2836.37	1891.67
	DM	HBP	CHD	Female	61	24.03	126	70	86	90	0.96	8.3	48	3.37	1914.72	1662.21
	DM	HBP	non-CHD	Male	59	21.25	128	70	84	90	0.93	9.2	67.3	4.75	3230.6	3761.21
	DM	HBP	CHD	Female	61	27.34	132	70	90	94	0.96	8	66.7	2.58	3572.62	1253.6
	DM	non-HBP	CHD	Male	60	22.05	130	70	80	84	0.95	7.1	70.1	4.56	3710.63	2916.1
	DM	HBP	CHD	Female	61	27.77	136	70	94	100	0.94	8.7	49.2	3.15	3991.44	2784.65
	DM	HBP	non-CHD	Female	61	22.37	130	68	76	80	0.95	6.2	82.8	2.26	3632.62	1720.78
	DM	HBP	CHD	Male	66	30.86	148	80	108	112	0.96	11	46.8	2.52	6428.19	2588.76
	DM	HBP	CHD	Male	47	34.22	150	80	116	120	0.97	8.7	95.1	1.6	3697.43	2977.96
	DM	HBP	non-CHD	Male	66	24.69	142	80	90	96	0.94	9.9	74.3	1.79	3118.39	2126.73
	DM	HBP	non-CHD	Female	59	24.41	136	80	84	90	0.93	7.4	49.6	4.15	3268.4	1990.13
	DM	HBP	CHD	Female	57	26.03	142	84	85	90	0.94	7	52.6	4.01	6822.42	1939.87
	DM	non-HBP	non-CHD	Male	56	25.01	136	70	88	94	0.94	6.2	80.1	1.95	2266.34	2252.18
	DM	non-HBP	non-CHD	Male	58	25.05	136	82	90	94	0.96	7.9	77.6	3.06	3148.39	3126.3
	DM	HBP	CHD	Male	67	27.44	126	70	98	102	0.96	5.9	88	1.22	3757.43	2034.33
	DM	HBP	non-CHD	Female	59	20.02	136	70	80	84	0.95	6.4	48.3	2.26	2248.34	2528.26
	DM	HBP	CHD	Male	60	25.39	132	66	86	91	0.95	6.2	65.7	2.98	1645.9	1924.82
	DM	HBP	non-CHD	Female	61	29.13	150	76	96	100	0.96	7.3	53.5	3.96	3049.99	2270.69
	DM	HBP	CHD	Female	54	26.76	136	72	90	94	0.96	5.9	50.4	2.23	3836.64	1469.84
	DM	HBP	non-CHD	Male	59	24.22	126	70	78	83	0.94	6.7	49.8	2.45	3638.62	2434.95
	DM	HBP	non-CHD	Male	66	27.54	130	80	82	100	0.82	6.8	79.1	4.23	3819	2733.56
	DM	HBP	non-CHD	Female	55	ND	120	70	ND	ND	ND	7	52.5	2.56	2837	1218.44
	DM	HBP	CHD	Female	61	25.77	120	80	76	76	1	5.3	48.4	1.33	1977	1054.28
	DM	non-HBP	non-CHD	Male	62	20.67	120	80	80	81	0.99	5.3	88.7	2.19	2839	1262.19
	DM	HBP	CHD	Male	62	21.97	128	70	85	86	0.99	6.3	83.6	4.42	2905	1313.21
	DM	HBP	CHD	Male	62	22.64	130	70	90	92	0.98	6.4	72.4	2.88	3258	2118.99
	DM	non-HBP	non-CHD	Male	59	ND	ND	ND	ND	ND	ND	5.8	93.2	1.56	3979	1715.66
	DM	HBP	non-CHD	Female	61	ND	136	78	ND	ND	ND	8.2	84.1	3.27	2445	1571.47
	DM	HBP	CHD	Female	55	25.52	150	85	86	88	0.98	7.2	87.9	2.53	3036	2146.22
	DM	HBP	non-CHD	Female	52	35.81	130	80	104	120	0.87	6.2	63.7	1.64	2729	1654.22
	DM	HBP	CHD	Male	67	29.38	128	72	100	100	1	8	157.7	3.04	2516	2471.87
	DM	HBP	non-CHD	Male	67	22.4	130	80	78	95	0.82	15.1	47.9	1.77	2794	1357.08
	DM	non-HBP	non-CHD	Male	66	23.59	ND	ND	79	90	0.88	8	80.8	3.51	3014	1485.22
	DM	HBP	CHD	Male	60	32.65	140	100	100	96	1.04	6.2	91.4	1.86	2486	1379.24
	DM	HBP	non-CHD	Female	46	27.34	120	80	80	84	0.95	4.8	54.9	2.67	3488	1662.86
	DM	HBP	CHD	Female	59	33.59	154	80	99	86	1.15	6.1	52.6	2.93	2818	1409.54
	DM	HBP	CHD	Male	62	17.39	136	57	76	92	0.83	5.5	92.1	1.36	1814	2560.41
	DM	HBP	CHD	Female	61	26.66	120	80	83	85	0.98	6	55.7	4.12	2552	1011.88
	DM	HBP	non-CHD	Female	58	28.3	120	70	92	99	0.93	7.7	59.9	2.5	3085	1335.78
	DM	non-HBP	non-CHD	Male	56	24.81	120	80	82	83	0.99	9.5	42.7	2.44	7836	1705.26
	DM	HBP	non-CHD	Female	58	20.98	130	70	86	86	1	5.1	60.9	2.71	2568	1391.61
	DM	HBP	CHD	Male	70	26.82	130	80	85	100	0.85	5.6	86	3.24	3453	1619.7
	DM	HBP	CHD	Female	56	26.7	130	70	88	89	0.99	6.8	84.7	2	2644	1875.55
	DM	non-HBP	non-CHD	Male	62	19.81	130	40	73	78	0.94	5	77.6	1.91	3389	1601.6
	DM	HBP	CHD	Male	67	25.35	120	80	103	105	0.98	10.9	94.4	1.29	2505	1333.65
	DM	HBP	non-CHD	Female	58	20.97	124	84	77	90	0.86	9.8	55.4	3.99	2876	1541.82
	DM	non-HBP	non-CHD	Male	56	29.06	120	70	104	98	1.06	7.8	35.2	2.02	4474	1593.84
	DM	HBP	non-CHD	Male	55	24.21	150	90	81	94	0.86	5.7	69.3	1.93	2359	1517.36
	DM	HBP	non-CHD	Male	66	26.02	150	78	100	105	0.95	8.5	81.4	3.62	1999	1829.2
	DM	HBP	non-CHD	Male	60	26.36	130	70	90	90	1	6.6	66.3	1.36	3813	1406.55
