# Supplementary material for: Hyperglycemia induced cathepsin L maturation linked to diabetic comorbidities and COVID-19 mortality
Source: eLife. 2024 Aug 16;13:RP92826. doi: 10.7554/eLife.92826 (PMC11329274; doi:10.7554/eLife.92826)
Supplement: Figure 3—source data 1. [file elife-92826-fig3-data1.xlsx]

## Sheet: Sheet1
	Figure 3A. SARS-CoV-2 Pseudovirus					Figure 3B. SARS-CoV-2 Pseudovirus					Figure 3C. SARS-CoV-2 Pseudovirus
	non-infection	Healthy Serum	DM Serum	Statistical test		Glu 5.6	Glu 15	Glu 25	Statistical test		Ins 0	Ins 20	Ins 100	Ins 500	Statistical test
	102	11506	53124	one-way ANOVA with Tukey’s post hoc test		0.701907	0.961095	2.65696	one-way ANOVA with Tukey’s post hoc test		1.14263	1.015	1.28246	1.01371	one-way ANOVA with Tukey’s post hoc test
	52	6210	47351			1.14263	1.02758	2.19075			1.15546	0.853539	1.42207	0.67999
	50	29502	42283			1.15546	2.07044	3.29606			0.701907	1.13146	0.547221	0.830478
	Figure 3D					Figure 3E. SARS-CoV-2 Pseudovirus					Figure 3F. SARS-CoV-2 Pseudovirus
						Control	KO	WT	Statistical test		WT-LG	KO-LG	WT-HG	KO-HG	Statistical test
						0	5769.96	60902.5	one-way ANOVA with Tukey’s post hoc test		0.701907	0.114071	2.65696	0.094741	one-way ANOVA with Tukey’s post hoc test
						0	7588.81	50216			1.14263	0.089044	2.19075	0.151123
						0	13680.4	75551.7			1.15546	0.115306	3.29606	0.181073
						Figure 3G. SARS-CoV-2 Pseudovirus					Figure 3H. SARS-CoV-2 Pseudovirus
						Glu 5.6	Glu 15	Glu 25	Statistical test		Ins 20	Ins 100	Ins 500	Statistical test
						1.5	1.31051	1.2	one-way ANOVA with Tukey’s post hoc test		0.804878	1.10345	1	one-way ANOVA with Tukey’s post hoc test
						0.264706	0.81907	0.514286			1.17073	1.01	1.21053
						1.23529	0.870417	1.28571			1.02439	0.896551	0.789474
