# Supplementary material for: Hyperglycemia induced cathepsin L maturation linked to diabetic comorbidities and COVID-19 mortality
Source: eLife. 2024 Aug 16;13:RP92826. doi: 10.7554/eLife.92826 (PMC11329274; doi:10.7554/eLife.92826)
Supplement: Figure 4—source data 1. [file elife-92826-fig4-data1.xlsx]

## Sheet: Sheet1
	Figure 4A. Huh7 Cell CTSL activity					Figure 4B. Huh7 Cell CTSL activity					Figure 4C. Huh7 Medium CTSL activity
	pH 7.35	pH 7.40	pH 7.45	Statistical test		Glu 5.6	Glu 15	Glu 25	Statistical test		Glu 5.6	Glu 25	Glu 50	Statistical test
	1.08735	1.08078	1.02407	one-way ANOVA with Tukey’s post hoc test		0.863984	1.81763	1.89017	one-way ANOVA with Tukey’s post hoc test		0.857743	2.22477	3.54054	one-way ANOVA with Tukey’s post hoc test
	0.938981	1.07256	0.96298			1.13602	1.92685	2.44279			0.977351	2.73084	2.0338
	0.940237	1.07918	1.03487			1.08016	1.87224	2.17104			0.987483	3.1368	4.51287
	1.03343	1.06853	0.979835			0.853703		2.18292			1.01026	3.00945	1.49843
						1.06614		1.93762			1.04304	1.42151	1.56565
											1.12412	1.31089	1.26598
	Figure 4D. Huh7 Cell CTSL activity					Figure 4E. Huh7 Cell CTSL activity
	Ins 0	Ins 20	Ins 100	Statistical test		Glu 5.6+Ins 0	Glu 5.6+Ins 100	Glu 25+Ins 0	Glu 25+Ins 100	Statistical test
	0.863984	0.996638	0.895364	one-way ANOVA with Tukey’s post hoc test		1.15647	0.675258	2.32443	2.40074	one-way ANOVA with Tukey’s post hoc test
	1.13602	0.979317	0.743148			0.914019	0.943146	2.33715	2.13654
	1	0.987978	0.819256			0.929509	1.07222	2.03352	2.26864
	Figure 4F. Mice IPGTT
	Time(min)	db/+					db/db					Statistical test
	0	7.8	8.5	8.8	6.9	7.9	16.6	14.2	19.2	27.5	14.8	two-way ANOVA with Sidak's multiple comparisons test
	15	15.3	12.4	17.3	18	17.8	38	35	35	35	35
	30	11.7	9.1	12.5	16	12.2	38	38	38	38	38
	60	8.7	8.3	16.1	11.2	13.7	29.8	35	35	35	35
	120	5.3	6.2	9.4	10.2	8	19.8	35	24.4	35	21.7
	Figure 4G. Mice Weight				Figure 4H. Mice Fasting Insulin
	db/+	db/db	Statistical test		db/+	db/db	Statistical test
	17.6	44.3	Unpaired t-test		0.693745	18.1034	Unpaired t-test
	18.7	43.5			0.563356	13.2742
	21.1	48.2			1.4033	10.1133
	23.8	42.7			1.10917	8.18534
	21	42.3			0.570027	11.4608
	19.8	43.6
	22	41.6
	18.9	46.5
	21.2	45.2
	21.8	47.2
	Figure 4I. Mice tissue CTSL activity							Figure 4J. Human Lung tissue CTSL activity
	Lung		Liver		Statistical test			non-DM	DM	Statistical test
	db/+	db/db	db/+	db/db				367144	1.06512e+06	Unpaired t-test
	45187	50993.3	40723.1	58296.4	Unpaired t-test			933627	908403
	17857.8	34458.5	73561.5	64104.1				441333	1326425
	27443.1	35483.2	44278.4	52752.2
	26978.1	32951.1	52545.4	60644.8
	40657.6	47529.3	47373	67607
	30857.8	43851.3	33337.6	60111.2
	37101.9	38125.6	68508.3	83354.7
	34224.3	39919.9	46079.6	60020.7
