# Supplementary material for: Hyperglycemia induced cathepsin L maturation linked to diabetic comorbidities and COVID-19 mortality
Source: eLife. 2024 Aug 16;13:RP92826. doi: 10.7554/eLife.92826 (PMC11329274; doi:10.7554/eLife.92826)
Supplement: Figure 5—figure supplement 1—source data 1. [file elife-92826-fig5-figsupp1-data1.xlsx]

## Sheet: Sheet1
	Figure 5-figure supplyment 1A. CTSL mRNA level						Figure 5-figure supplyment 1B. CTSL mRNA level						Figure 5-figure supplyment 1C. CTSL mRNA level
	D-Glu 5.6	D-Glu 15	D-Glu 25	statistical test			L-Glu 5.6	L-Glu 15	L-Glu 25	statistical test			Ins 20	Ins 100	Ins 50	statistical test
	0.891387	0.922821	0.78683	one-way ANOVA with Tukey’s post hoc test			1.00232	0.872569	1.14341	one-way ANOVA with Tukey’s post hoc test			1.01687	0.867022	1.05273	one-way ANOVA with Tukey’s post hoc test
	1.02393	0.916447	0.867012				1.08173	1.26869	1.24258				1.2694	0.867022	1.00985
	1.00984	0.885229	0.879115				0.91595	1.15136	1.00929				0.749573	1.00985	1.08233
	1.07484	0.820243	0.820243										0.903841	1.03107	0.855086
	Figure 5-figure supplyment 1D. Mice tissue CTSL mRNA level							Figure 5-figure supplyment 1E. Human Lung tissue CTSL mRNA level
	Lung		Liver		Statistical test			non-DM	DM	Statistical test
	db/+	db/db	db/+	db/db	Mann-Whitney U-test			0.005893	0.010027	Mann-Whitney U-test
	0.002472	0.004395	0.046391	0.063372				0.004466	0.005746
	0.001848	0.00149	0.012344	0.044502				0.014275	0.010097
	0.003521	0.002323	0.095391	0.056328
	0.01323	0.006087	0.03125	0.020333
	0.00144	0.002388	0.028956	0.005759
