# Supplementary material for: Hyperglycemia induced cathepsin L maturation linked to diabetic comorbidities and COVID-19 mortality
Source: eLife. 2024 Aug 16;13:RP92826. doi: 10.7554/eLife.92826 (PMC11329274; doi:10.7554/eLife.92826)
Supplement: Figure 5—figure supplement 2—source data 1. [file elife-92826-fig5-figsupp2-data1.xlsx]

## Sheet: Sheet1
	Figure 5-figure supplyment 2A. CTSL mRNA level
	proCTSL				sc-mCTSL				dc-mCTSL
	Glu 5.6	Glu 15	Glu 25	Statistical test	Glu 5.6	Glu 15	Glu 25	Statistical test	Glu 5.6	Glu 15	Glu 25	Statistical test
	0.984422	1.06959	0.687158	one-way ANOVA with Tukey’s post hoc test	0.682066	0.971188	1.40923	one-way ANOVA with Tukey’s post hoc test	0.539322	1.08475	1.1743	one-way ANOVA with Tukey’s post hoc test
	1.15453	0.840442	0.782397		1.18629	1.11289	1.73663		1.36175	0.820912	1.18367
	0.861045	0.902035	0.500986		1.13165	1.15294	1.47203		1.09893	0.968242	1.10644
