# Supplementary material for: Hyperglycemia induced cathepsin L maturation linked to diabetic comorbidities and COVID-19 mortality
Source: eLife. 2024 Aug 16;13:RP92826. doi: 10.7554/eLife.92826 (PMC11329274; doi:10.7554/eLife.92826)
Supplement: Figure 5—source data 1. [file elife-92826-fig5-data1.xlsx]

## Sheet: Sheet1
	Figure 5B
					proCTSL					sc-mCTSL					dc-mCTSL
					Glu 5.6+Ins 0	Glu 5.6+Ins 100	Glu 25+Ins 0	Glu 25+Ins 100	Statistical test	Glu 5.6+Ins 0	Glu 5.6+Ins 100	Glu 25+Ins 0	Glu 25+Ins 100	Statistical test	Glu 5.6+Ins 0	Glu 5.6+Ins 100	Glu 25+Ins 0	Glu 25+Ins 100	Statistical test
					1.11022	0.74938	0.433911	0.367202	one-way ANOVA with Tukey’s post hoc test	1.07479	0.680554	1.24233	1.38713	one-way ANOVA with Tukey’s post hoc test	1.10519	0.845032	1.00976	1.18458	one-way ANOVA with Tukey’s post hoc test
					0.889784	0.736803	0.523786	0.477299		0.864431	0.727225	1.34041	2.42363		0.894809	1.21405	1.05551	1.13552
					0.835557	0.757515	1.00336	0.749624		0.979921	0.981576	1.94643	2.67667		0.989079	1.23024	1.40591	1.88116
					1.16444	0.688177	0.836293	0.912248		1.02008	0.880937	2.12657	1.09979		1.07705	0.850012	1.57666	2.27779
					0.928235	0.727528	0.661241	0.8		0.985988	0.857339	1.13914	1.18762		0.922948	0.833621	0.850893	1.0675
	Figure 5C
					proCTSL		sc-mCTSL		dc-mCTSL		Statistical test
					D-Glu 5.6+L-Glu 0	D-Glu 5.6+L-Glu 19.4	D-Glu 5.6+L-Glu 0	D-Glu 5.6+L-Glu 19.4	D-Glu 5.6+L-Glu 0	D-Glu 5.6+L-Glu 19.4	one-way ANOVA with Tukey’s post hoc test
					0.865536	0.951945	0.996297	0.964687	0.711084	0.865021
					1.16663	1.173	1.05971	1.0643	1.45594	1.05826
					0.967833	0.949595	0.943992	0.944008	0.832978	0.800997
	Figure 5D
				proCTSL		sc-mCTSL		dc-mCTSL		Statistical test
				db/+	db/db	db/+	db/db	db/+	db/db	one-way ANOVA with Tukey’s post hoc test
				0.211322	0.132065	0.158742	0.284407	0.205348	0.334118
				0.168249	0.122037	0.276577	0.417376	0.309816	0.417896
				0.153941	0.109087	0.188197	0.369616	0.219697	0.408616
	Figure 5E
					proCTSL		sc-mCTSL		dc-mCTSL		Statistical test
					non-DM	DM	non-DM	DM	non-DM	DM	one-way ANOVA with Tukey’s post hoc test
					1.05426	1.95921	3.06284	0.860797	3.11624	3.82167
					1.23023	2.24691	3.09754	0.802613	2.91835	2.81317
					0.983236	1.87941	3.26217	0.745816	2.62511	3.36558
