# Supplementary material for: Hyperglycemia induced cathepsin L maturation linked to diabetic comorbidities and COVID-19 mortality
Source: eLife. 2024 Aug 16;13:RP92826. doi: 10.7554/eLife.92826 (PMC11329274; doi:10.7554/eLife.92826)
Supplement: Figure 6—source data 1. [file elife-92826-fig6-data1.xlsx]

## Sheet: Sheet1
	Figure 6E. Colocalization of CTSL and calreticulin						Figure 6F. Colocalization of CTSL and GM130						Figure 6G. Colocalization of CTSL and Lamp1
	Glu 5.6	Glu 25	statistical test				Glu 5.6	Glu 25	statistical test				Glu 5.6	Glu 25	statistical test
	0.75	0.6	Unpaired t-test				0.66	0.7	Unpaired t-test				0.51	0.66	Unpaired t-test
	0.91	0.44					0.58	0.54					0.44	0.7
	0.79	0.53					0.66	0.61					0.57	0.7
